# Supplementary material
Source: publisher site journal article supplement (https://www.dovepress.com/article/243787)
Supplement: Supplementary file 1 [file get_supplementary_file.php]

**Supplementary Materials**

The online-only materials section includes 1 figure and 4 tables.

**Supplementary Figure 1**: Trial profile.

**Supplementary Table 1.** Extent of exposure to camrelizumab (safety population)

**Supplementary Table 2**. Summary of adverse events of special interest (AESI).

**Supplementary Table 3.** Summary of camrelizumab PK parameters after single IV infusion.

**Supplementary Table 4.** PD-L1 immunohistochemistry examination of 12 patients with available tumor biopsies.

**Supplementary Table 5.** Participating institutions.

**Supplemental Figures**

**Supplementary Figure 1**: Trial profile. The First-in-Human (FiH) dose study consisted of two parts: the first part was a dose-escalation study investigating doses of 1 mg/kg to 10 mg/kg. The second part was an expansion cohort investigating the benefit/risk profile of camrelizumab in four different tumor types, including endometrial carcinoma, thymic carcinoma, biliary tract carcinoma and carcinoma of unknown primary.

**

**

**Supplementary Table 1.** Extent of exposure to camrelizumab (safety population).

|  | **Dose-escalation** | | | | **Dose-expansion** | **Total** |
| --- | --- | --- | --- | --- | --- | --- |
| **1 mg/kg (n=6)** | **3 mg/kg (n=6)** | **6 mg/kg (n=4)** | **10 mg/kg (n=7)** | **200 mg (n=26)** | **n=49** |
| **Total dose administered, mg** | | | | | | |
| Median | 339.4 | 1079.2 | 1479 | 1788 | 500 | 600 |
| Range | 156.6–4389.0 | 165.0–15678.0 | 1156.2–29740.4 | 452.0–4105.0 | 200.0–3800.0 | 156.6–29740.4 |
| **Duration of therapy, weeks** | | | | | | |
| Median | 15.4 | 12.1 | 9.3 | 9.3 | 8.3 | 9.3 |
| Range | 6.9–132.9 | 5.9–167.9 | 7.9–153.1 | 3.4–12.1 | 3.1–72.1 | 3.1–167.9 |
| **Dose intensity, mg/kg/week** | | | | | | |
| Median | 0.4 | 1.2 | 2.3 | 2.9 | 0.6 | 0.8 |
| Range | 0.2–0.4 | 0.5–1.3 | 1.7–2.7 | 2.1–4.2 | 0.2–1.3 | 0.2–4.2 |

**Supplementary Table 2**. Summary of adverse events of special interest (AESI).

| **Subject** | **Treatment Group** | **Adverse Event (Preferred Term)** | **Severity** | **Causality** | **Serious** | **Outcome** |
| --- | --- | --- | --- | --- | --- | --- |
| 1 | 1 mg/kg | ALT increased | Grade 3 | Suspected | No | Resolved |
| 1 mg/kg | AST increased | Grade 3 | Suspected | No | Resolved |
| 2* | 3 mg/kg | Diarrhea | Grade 3 | Suspected | Yes | Resolved |
| 3 mg/kg | Diarrhea | Grade 3 | Suspected | No | Resolved with sequelae |
| 3 | 3 mg/kg | Autoimmune hepatitis | Grade 3 | Suspected | No | Not resolved |
| 4 | 6 mg/kg | Pneumonitis | Grade 3 | Suspected | Yes | Resolving |
| 6 mg/kg | Hypopituitarism | Grade 3 | Suspected | Yes | Not resolved |
| 5 | 6 mg/kg | Pancreatitis | Grade 2 | Suspected | Yes | Resolved |
| 6 | 200 mg | Arthropathy | Grade 2 | Suspected | No | Not resolved |

* Diarrhea occurred twice in this patient. One is serious and another is not serious. ALT=alanine aminotransferase; AST=aspartate aminotransferase.

**Supplementary Table 3**. Summary of camrelizumab PK parameters after single IV infusion.

| **PK parameter (unit)** | | **Dose-escalation** | | | | **Dose-expansion** |
| --- | --- | --- | --- | --- | --- | --- |
| **1 mg/kg (n=6)** | **3 mg/kg (n=6)** | **6 mg/kg (n=4)** | **10 mg/kg (n=9)** | **200 mg (n=17)** |
| n | | 6 | 6 | 4 | 7 | 16 |
| **Cmax (mg/L)** | Mean | 23.472 | 69.93 | 152.348 | 243.031 | 66.482 |
| SD | ±5.259 | ±11.276 | ±8.334 | ±62.718 | ±16.665 |
| Geomean | 22.956 | 69.214 | 152.171 | 235.637 | 64.582 |
| % CV | -22.4 | -16.1 | -5.5 | -25.8 | -25.1 |
| **Tmax (day)** | Median | 0.02 | 0.06 | 0.06 | 0.02 | 0.02 |
| Min, Max | 0.02, 0.1 | 0.02, 0.1 | 0.02, 0.27 | 0.02, 0.1 | 0.02, 0.27 |
| **AUC0-28 (mg.day/L)** | Mean | 82.733 | 394.742 | 1146.697 | 1636.745 | 370.001 |
| SD | ±23.411 | ±61.363 | ±196.011 | ±655.418 | ±138.97 |
| Geomean | 79.794 | 390.723 | 1134.248 | 1520.396 | 346.603 |
| % CV | -28.3 | -15.5 | -17.1 | -40 | -37.6 |
| **AUCinf (mg.day/L)** | Mean | 84.75 | 420.479 | 1345.791 | 2066.223 | 405.789 |
| SD | ±23.505 | ±71.287 | ±381.273 | ±833.928 | ±166.258 |
| Geomean | 81.883 | 415.275 | 1306.707 | 1887.614 | 377.997 |
| % CV | -27.7 | -17 | -28.3 | -40.4 | -41 |
| **t1/2 (day)** | Mean | 3.134 | 5.977 | 8.263 | 10.767 | 6.401 |
| SD | ±0.309 | ±1.926 | ±2.74 | ±5.102 | ±2.401 |
| **CL (L/day/kg)** | Mean | 0.013 | 0.007 | 0.005 | 0.006 | 0.564 ***** |
| SD | ±0.004 | ±0.001 | ±0.001 | ±0.003 | ±0.198 |
| Median | 0.01 | 0.01 | 0 | 0 | 0.57***** |
| **Vd (L/kg)** | Mean | 0.055 | 0.061 | 0.055 | 0.073 | 4.271***** |
| SD | ±0.015 | ±0.014 | ±0.005 | ±0.025 | ±0.77 |
| Median | 0.05 | 0.06 | 0.06 | 0.06 | 4.03***** |
| **MRT (day)** | Mean | 4.435 | 8.593 | 12.576 | 14.663 | 8.392 |
| SD | ±0.485 | ±2.899 | ±4.456 | ±6.499 | ±2.924 |

*The units for CL and Vd at 200 mg are L/day and L, respectively. n=number of subjects; %CV=percent coefficient of variation; PK=pharmacokinetic(s); SD=standard deviation; Vd=volume of distribution.

**Supplementary Table 4.** PD-L1 Immunohistochemistry Examination of 12 patients with available tumor biopsies.

| **Patient number** | **Location** | **Tumor Content (%)** | **H-score** | **Best Response** |
| --- | --- | --- | --- | --- |
| 1 | Lymph node, metastatic urothelial carcinoma, left groin node | 15 | 0 | PR |
| 2 | Poorly differentiated thyroid carcinoma | 85 | 9 | PD |
| 3 | Endometrial, cervix adenocarcinoma | 65 | 7 | PD |
| 4 | Esophageal squamous cell carcinoma | 10 | 2 | PD |
| 5 | Sino-nasal metastatic carcinoma | 60 | 5 | PD |
| 6 | Ovarian metastatic adenocarcinoma | 35 | 0 | PD |
| 7 | Ovarian carcinoma | 70 | 0 | PD |
| 8 | Ductal breast carcinoma | 60 | 0 | PD |
| 9 | Biliary tract cancer, metastatic adenocarcinoma | 15 | 0 | PD |
| 10 | CUP, metastatic adenocarcinoma | 1 | 0 | SD |
| 11 | Biliary tract cancer, metastatic adenocarcinoma | 10 | 0 | PD |
| 12 | Endometrial adenocarcinoma | 35 | 0 | SD |

CUP=carcinoma of unknown primary; PR=partial response; SD=stable disease; PD=progressive disease.

**Supplementary Table 5.** Participating institutions.

| **Participating institutions** | **Investigators** |
| --- | --- |
| Nucleus Network | Jason D Lickliter / Mark Voskoboynik |
| Austin Hospital/Olivia Newton-John Cancer Research Institute | Hui K. Gan / Anis Hamid / Surein Arulananda |
| Linear Clinical Research Limited | Tarek Meniawy / Michael Milward |
| Blacktown Hospital | Bo Gao / Adnan Nagrial |
| Chris O’Brien Life House | Peter Grimison / Micelle Harrison |
